# Supplementary material for: An Optimized Sporulation Method for the Wheat Fungal Pathogen Pyrenophora Tritici-Repentis
Source: Research Square preprint supplement (doi:10.21203/rs.3.rs-253977/v1), 2021-03-09
Supplement: Supplementary file 1 [file 2dd01ad5248f58eee0c8a68a.docx]

**Supplementary Data**

**Figure S1. Collection sites of seven Australian *Ptr* isolates from the field**

Each collection site is depicted as a grain pictogram with the different colours representing isolates from different states. The exception is Western Australia, where the three blue *Ptr* strains were isolated from wheat whilst the yellow site represents a *Ptr* strain isolated from barley. All other *Ptr* strains were isolated from wheat. This figure was created using Map Data © 2021 Google.

**
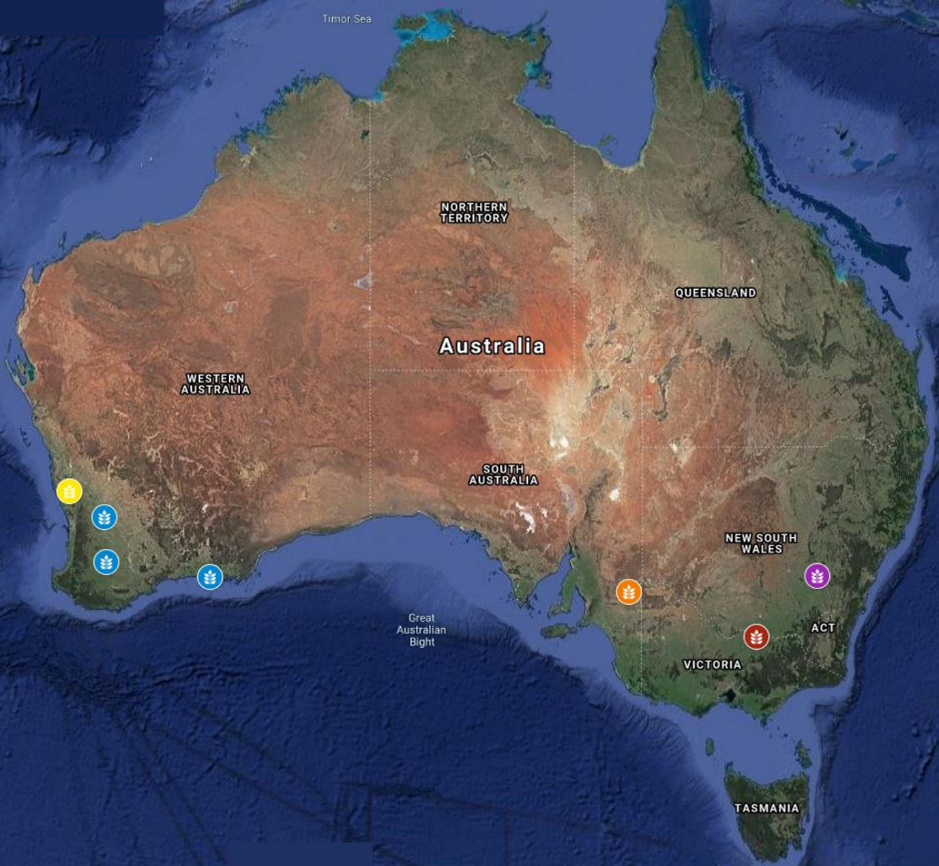
**

**Table S1. Growth conditions tested for conidia production in *Ptr***

| **Parameters** | **Vegetative** | **Conidiophore** | **Conidia** |
| --- | --- | --- | --- |
| Duration | 3, 5, 7, 10, 12, 14 days | 6, 12, 18, 24, 48 h | 6, 12, 18, 24, 48 h |
| Light Source | White, N-UV, UV-B, BLB, Darkness | White, N-UV, UV-B, BLB, Darkness | White, N-UV, Darkness |
| Light Cycle | 12h Light/Dark, Continuous | 12h Light/Dark, Continuous | 12h Light/Dark, Continuous |
| Temperature | 22-26C | 22-26C | 15-24C |
| Plate Lid | Sealed, Removed, Loose | Sealed, Removed, Loose | Sealed, Removed, Loose |
| Growth Media | V8-PDA, ½ PDA, TWA | V8-PDA, ½ PDA, TWA | - |
| Plug Location | Growing Edge, Total | - | - |
| Wounding | 200ul Tip End, 1ml Tip End, Cork Borers | - | - |

**Table S2. All harvesting parameters tested for purity and concentration in *Ptr***Optimal values are underlined.

| **Stages** | **Tested parameters** |
| --- | --- |
| Preparation | None, Remove Excess Agar |
| Solution | Gelatin at 5 %, 0.5 %, 0.05 %, Tween 20 at 2 %, 0. 2%, 0.02 %, H2O |
| Release | None, Tip Scraping, Scalpel Scraping, Vortexing, Shaker Rack, Centrifuge, Large Brush, Small Brush |
| Extraction | Regular Pipetting, Pouring, Pipetting with a cut tip, direct pour followed by washing with a cut tip |
| Purification | None, Gauze, cheesecloth, sorbitol gradient, 4000 rpm spin, 1000 rpm spin, |
| Concentration | None, 4000 rpm spin, 1000 rpm spin |
